# Supplementary material for: Genomic, Antimicrobial Resistance, and Public Health Insights into Enterococcus spp. from Australian Chickens
Source: PubMed Central journal article supplement (PMC6663891; doi:10.1128/jcm.00319-19), 2019-07-26
Supplement: JCM.00319-19-s0001.pdf [file JCM.00319-19-s0001.pdf]

**Table S. 1 Breakpoints used for susceptibility testing of *Enterococcus* spp. isolated from chickens at slaughter in Australia**

| Class           | Agent                     | Species             | Range (mg/L) | ECOFF Breakpoint c | Clinical Breakpoint a b |        |
|-----------------|---------------------------|---------------------|--------------|--------------------|-------------------------|--------|
|                 |                           |                     |              |                    | CS                      | CR     |
| Aminoglycosides | Gentamicin                | All                 | 128 - 1024   | - d                | ≤500                    | >500b  |
|                 | Kanamycin d               | All                 | 128 - 1024   | -                  | ≤512                    | ≥1024b |
| Glycopeptides   | Vancomycin                | All                 | 0.25 - 32    | 4                  | ≤4                      | ≥32    |
|                 | Teicoplanin               | All                 | 0.25 - 128   | 2                  | ≤8                      | ≥32    |
| Lincosamide     | Lincomycin d              | All                 | 1 - 8        | -                  | ≤2                      | ≥8b    |
| Lipopeptides    | Daptomycin                | All                 | 0.25 - 16    | 4                  | ≤4                      | -      |
| Macrolides      | Erythromycin              | <i>E. faecium</i> , | 0.25 - 8     | 4                  | ≤0.5                    | ≥8     |
|                 |                           | <i>E. faecalis</i>  |              |                    |                         |        |
|                 |                           | <i>E. hirae</i>     | 0.25 - 8     | 2                  | ≤0.5                    | ≥8     |
| Oxazolidinones  | Linezolid                 | All                 | 0.5 - 8      | 4                  | ≤2                      | ≥8     |
| Penicillins     | Ampicillin                | All                 | 0.25 - 64    | 4                  | ≤8                      | ≥16    |
|                 | Benzylpenicillin          | <i>E. faecium</i> , | 0.25 - 16    | 16                 | ≤8                      | ≥16    |
| Phenicol        | Chloramphenicol           | <i>E. faecium</i> , | 2 - 32       | 32                 | ≤8                      | ≥32    |
|                 |                           | <i>E. faecalis</i>  |              |                    |                         |        |
|                 |                           | <i>E. hirae</i>     | 2 - 32       | 8                  | ≤8                      | ≥32    |
| Streptogramins  | Quinupristin-Dalfopristin | <i>E. faecium</i>   | 0.5 - 32     | -                  | ≤1                      | ≥4     |
|                 | Virginiamycin             | <i>E. faecium</i>   | 0.25 - 128   | 4                  | -                       | -      |
|                 |                           | <i>E. faecalis</i>  | 0.25 - 128   | 32                 | -                       | -      |
|                 |                           | <i>E. hirae</i>     | 0.25 - 128   | -                  | -                       | -      |
| Tetracyclines   | Tetracycline              | All                 | 1 - 32       | 4                  | ≤4                      | ≥16b   |

a CLSI VETO1S2 (1) or M100S (2) breakpoints (mg/L), CS = clinically-sensitive; ; CI = clinically-intermediate (between CS and CR, not shown); CR = clinically-resistant

b NARMS (2017) (3) breakpoints (mg/L)

c EUCAST (4) epidemiological cut-off values (mg/L)

d Not defined

**Table S. 2. Frequency and proportion of different MLST found in *Enterococcus faecium* and *Enterococcus faecalis* isolates**

| <b>Enterococcus faecium</b> |                  |                   | <b>Enterococcus faecalis</b> |                  |                   |
|-----------------------------|------------------|-------------------|------------------------------|------------------|-------------------|
| <b>MLST</b>                 | <b>Frequency</b> | <b>Percentage</b> | <b>MLST</b>                  | <b>Frequency</b> | <b>Percentage</b> |
| ST492                       | 7                | 8.97              | ST314                        | 7                | 17.07             |
| ST195                       | 5                | 6.41              | ST16                         | 5                | 12.20             |
| ST241                       | 5                | 6.41              | ST502                        | 4                | 9.76              |
| ST124                       | 4                | 5.13              | ST530                        | 4                | 9.76              |
| ST10                        | 3                | 3.85              | ST202                        | 2                | 4.88              |
| ST507                       | 3                | 3.85              | ST444                        | 2                | 4.88              |
| ST517                       | 3                | 3.85              | ST835                        | 2                | 4.88              |
| ST640                       | 3                | 3.85              | ST22                         | 1                | 2.44              |
| ST8                         | 2                | 2.56              | ST59                         | 1                | 2.44              |
| ST236                       | 2                | 2.56              | ST82                         | 1                | 2.44              |
| ST158                       | 1                | 1.28              | ST100                        | 1                | 2.44              |
| ST190                       | 1                | 1.28              | ST136                        | 1                | 2.44              |
| ST194                       | 1                | 1.28              | ST249                        | 1                | 2.44              |
| ST240                       | 1                | 1.28              | T287                         | 1                | 2.44              |
| ST245                       | 1                | 1.28              | ST403                        | 1                | 2.44              |
| ST511                       | 1                | 1.28              | ST477                        | 1                | 2.44              |
| ST944                       | 1                | 1.28              | ST616                        | 1                | 2.44              |
| ST1243                      | 2                | 1.28              | ST634                        | 1                | 2.44              |
| unknown                     | 31               | 42.31             | unknown                      | 4                | 9.76              |
| <b>Total</b>                | <b>77</b>        |                   | <b>Total</b>                 | <b>41</b>        |                   |

## References

1. CLSI. 2015. Performance standards for antimicrobial disk and dilution susceptibility tests for bacteria isolated from animals; 3rd Edition. Clinical and Laboratory Standards Institute, Wayne, PA.
2. CLSI. 2016. Performance standards for antimicrobial susceptibility testing: 26th Edition, vol 35. Clinical and Laboratory Standards Institute, Wayne, PA.
3. NARMS. 2017. National Antimicrobial Resistance Monitoring System: NARMS integrated report, 2015. U.S. Department of Health and Human Services, Laurel, MD.
4. EUCAST. 2016. Breakpoint tables for interpretation of MICs and zone diameters: Version 6.0, valid from 2016-01-01.  
[http://www.eucast.org/fileadmin/src/media/PDFs/EUCAST\\_files/Breakpoint\\_tables/v\\_8.1\\_Breakpoint\\_Tables.pdf](http://www.eucast.org/fileadmin/src/media/PDFs/EUCAST_files/Breakpoint_tables/v_8.1_Breakpoint_Tables.pdf). Accessed
